# Supplementary material for: Validation of Zulu Watch against Polysomnography and Actigraphy for On-Wrist Sleep-Wake Determination and Sleep-Depth Estimation
Source: Sensors (Basel). 2020 Dec 25;21(1):76. doi: 10.3390/s21010076 (PMC7796293; doi:10.3390/s21010076)
Supplement: Supplementary file 1 [file sensors-21-00076-s001.pdf]

Supplementary Data

**Supplementary Table S1.** Intraclass Correlation Coefficients Between Zulu Watch and PSG

| Summary Statistic              | ICC  | 95% CI    | Probability That<br>ICC=0 <sup>1</sup> | Inter-Rater Reliability |
|--------------------------------|------|-----------|----------------------------------------|-------------------------|
| <b>TIB</b>                     | 0.46 | 0.00–0.92 | p=0.02*                                | Poor                    |
| <b>TST</b>                     | 0.50 | 0.12–0.76 | p=0.004*                               | Moderate                |
| <b>SE</b>                      | 0.60 | 0.26–0.87 | p≤0.001**                              | Moderate                |
| <b>Time of sleep onset</b>     | 0.84 | 0.64–0.95 | p≤0.001**                              | Good                    |
| <b>Time of final awakening</b> | 0.83 | 0.61–0.95 | p≤0.001**                              | Good                    |

CI, confidence interval; ICC, intraclass correlation coefficient; SE, sleep efficiency; TIB, time in bed; TST, total sleep time. <sup>1</sup>Significance for the probability that the coefficient is zero, implying no agreement; \*p<0.05; \*\*p≤0.001.

**Supplementary Table S2.** Intraclass Correlation Coefficients Between Zulu Watch and Actigraphy

| Summary Statistic              | ICC  | 95% CI    | Probability That<br>ICC=0 <sup>1</sup> | Inter-Rater Reliability |
|--------------------------------|------|-----------|----------------------------------------|-------------------------|
| <b>TIB</b>                     | 0.46 | 0.00–0.92 | p=0.028*                               | Poor                    |
| <b>TST</b>                     | 0.54 | 0.00–0.92 | p=0.008*                               | Moderate                |
| <b>SE</b>                      | 0.51 | 0.06–0.81 | p=0.011*                               | Moderate                |
| <b>Time of sleep onset</b>     | 0.84 | 0.63–0.95 | p≤0.001**                              | Good                    |
| <b>Time of final awakening</b> | 0.84 | 0.62–0.96 | p≤0.001**                              | Good                    |

CI, confidence interval; ICC, intraclass correlation coefficient; SE, sleep efficiency; TIB, time in bed; TST, total sleep time. <sup>1</sup>Significance for the probability that the coefficient is zero, implying no agreement; \*p<0.05; \*\*p≤0.001.
